# Supplementary material for: Thermochemical behavior of alkali pretreated biomass – a thermogravimetric and Py-GC/FID study
Source: Royal Society of Chemistry journal article supplement (doi:10.1039/d3se00213f), 2023-01-01
Supplement: d3se00213f1.pdf [file d3se00213f1.pdf]

## **Supplementary Information**

### **Thermochemical Behavior of Alkali Pretreated Biomass – a Thermogravimetric and Py-GC/FID study**

Candice Ellison<sup>a\*</sup>, Manuel Garcia-Perez<sup>b</sup>, Charles A. Mullen<sup>a</sup>, Madhav P. Yadav<sup>a</sup>

<sup>a</sup> Eastern Regional Research Center, Agricultural Research Service, US Department of Agriculture, 600 E  
Mermaid Lane, Wyndmoor, PA, USA

<sup>b</sup> Biological Systems Engineering, Washington State University, WA, USA

\*Corresponding author: Tel :+1215-233-6493; E-mail address: candice.ellison@usda.gov

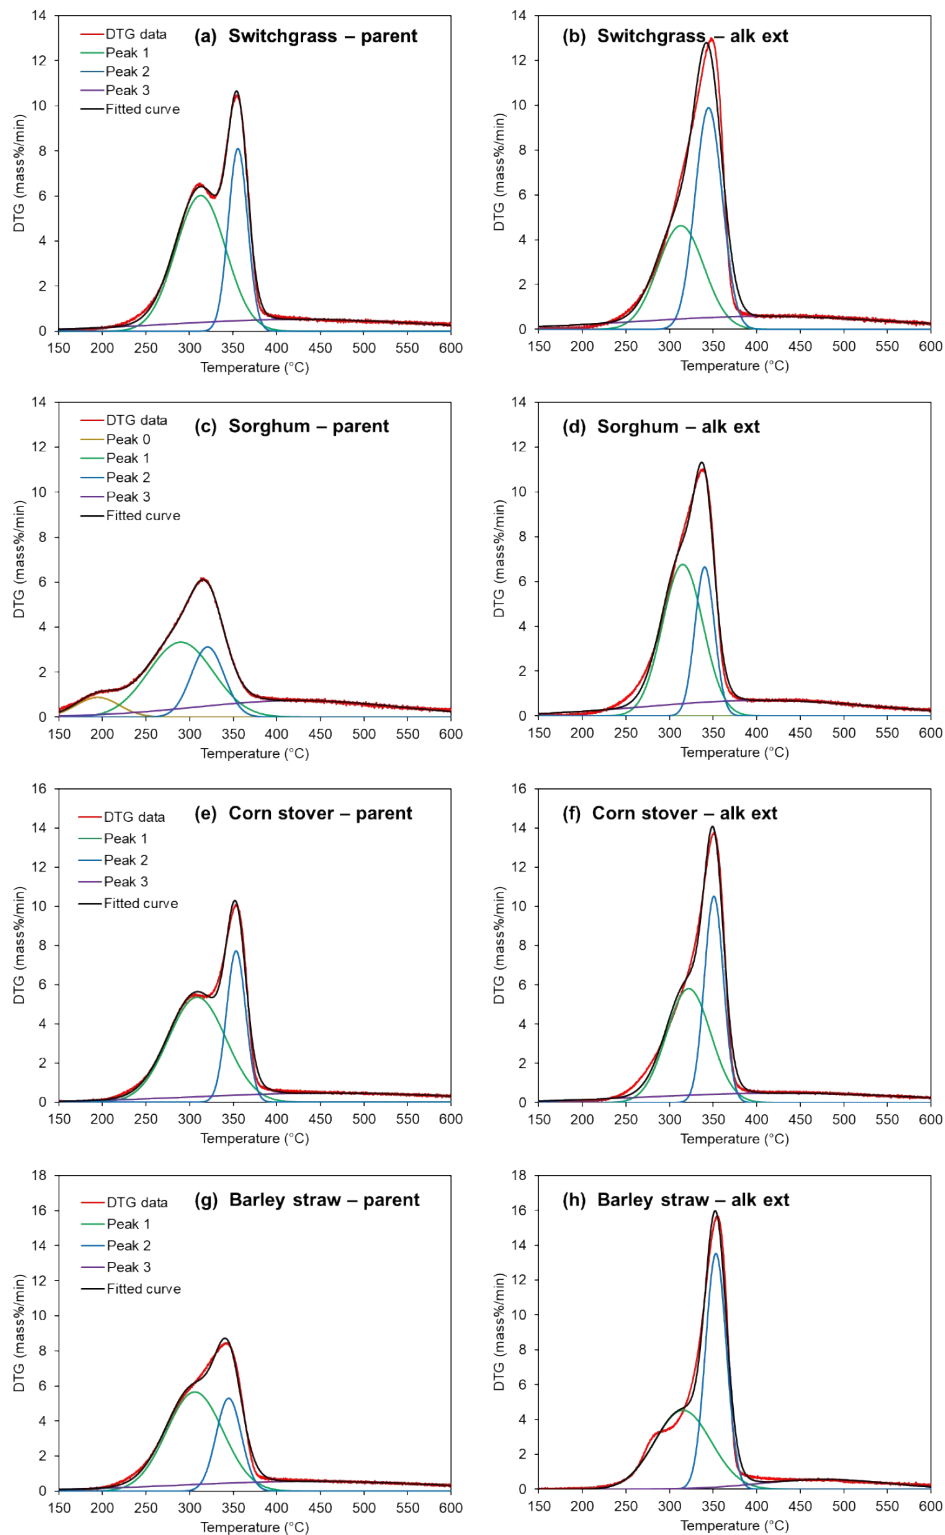

Figure S1: Deconvoluted DTG curves for each parent and alkali extracted biomass. Peak 1, 2, and 3 represent decomposition of hemicellulose, cellulose, and lignin, respectively. For sorghum biomass a peak attributed to protein decomposition was observed, which is denoted as Peak 0.

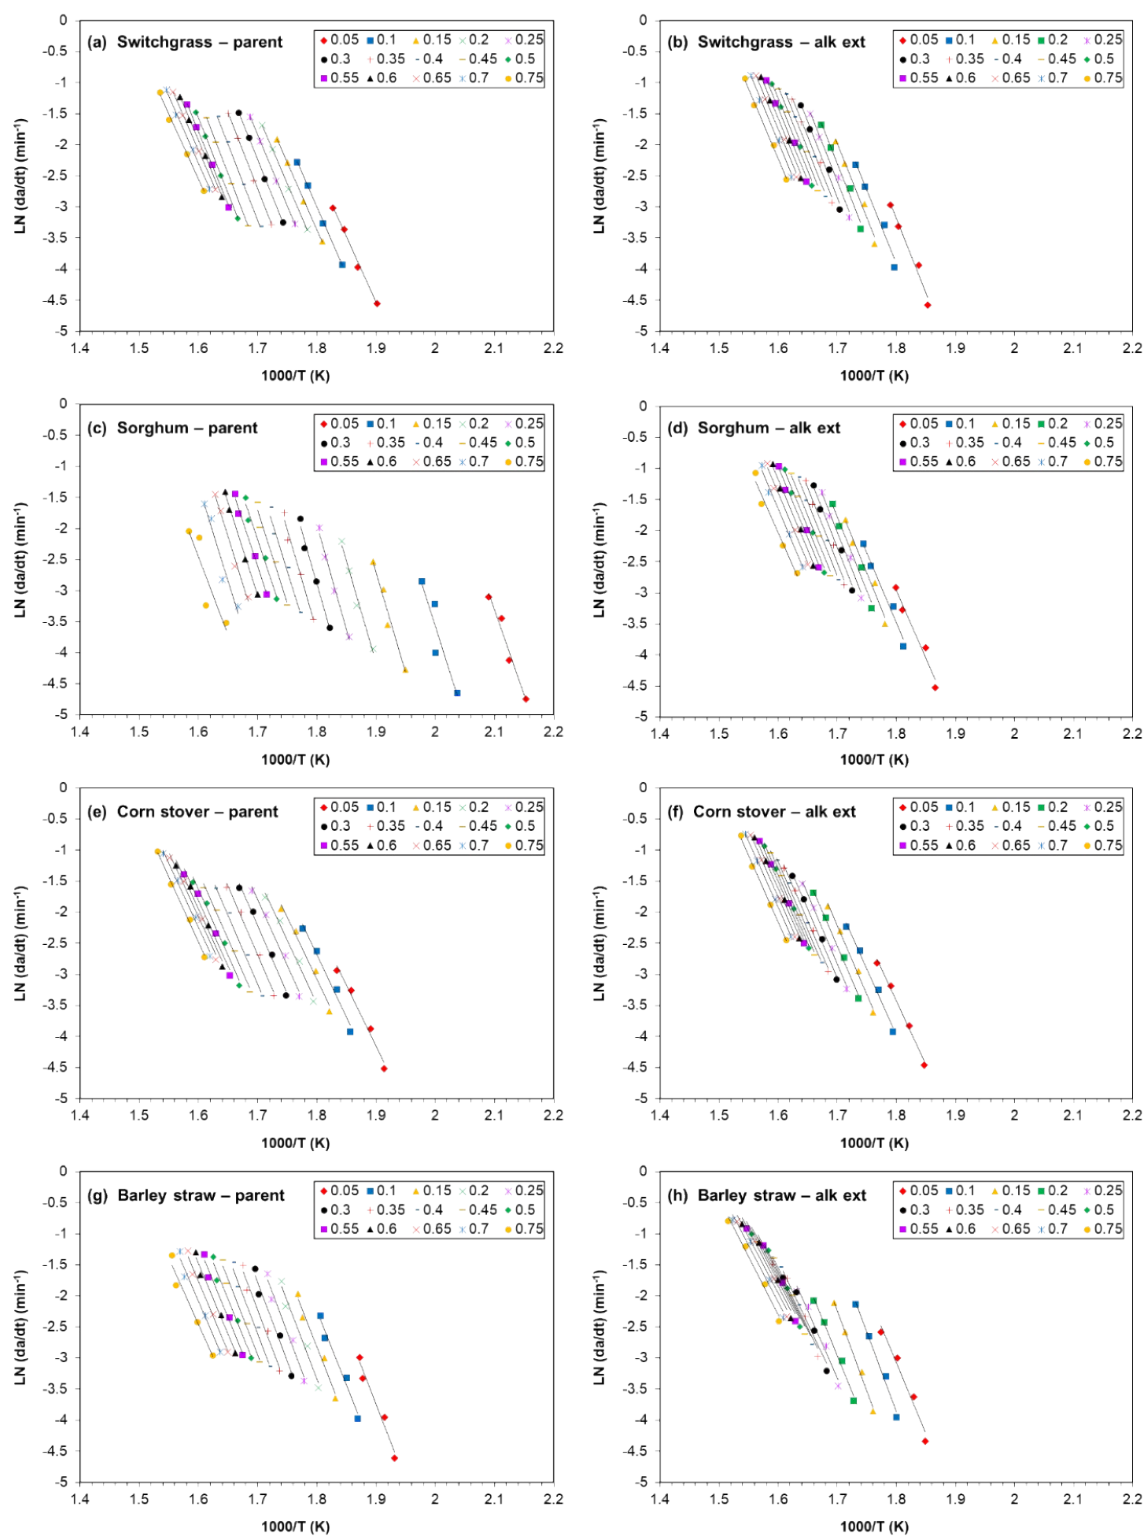

Figure S2:  $\ln(da/dt)$  vs  $1000/T$  plots used for kinetic analysis by the Freidman method for each parent biomass (a, c, e, and g) and alkali extracted biomass (b, d, f, and h) sample.

Table S1: Compounds quantified by Py-GC/FID analysis (yields reported in g / 100 g dry biomass) for switchgrass. Normalized yields are normalized to the original biomass basis.

| Peak no. | RT     | Compound                              | Parent | Alkali PT | Alkali PT (normalized) |
|----------|--------|---------------------------------------|--------|-----------|------------------------|
| 1        | 4.669  | 2,3-Butanedione                       | 0.2    | 0.2       | 0.1                    |
| 2        | 5.266  | 1,5-Hexadien-3-ol                     | 1.1    | 1.3       | 0.7                    |
| 3        | 5.605  | Benzene                               | 0.4    | 0.6       | 0.3                    |
| 4        | 6.467  | 2,5-Dimethylfuran                     | 1.8    | 3.1       | 1.8                    |
| 5        | 7.020  | 2-Butenal                             | 0.4    | 0.5       | 0.3                    |
| 6        | 7.559  | Acetic acid                           | 6.8    | 2.2       | 1.3                    |
| 7        | 8.907  | Acetol                                | 3.5    | 5.5       | 3.2                    |
| 8        | 9.960  | 3-Penten-2-one                        | 0.2    | N.D.      | N.D.                   |
| 9        | 13.139 | 1-Hydroxy-2-butanone                  | 0.7    | 1.2       | 0.7                    |
| 10       | 13.473 | Acetic acid, methyl ester             | 1.5    | 1.1       | 0.6                    |
| 11       | 14.582 | 3-Pentyn-1-ol                         | 0.3    | 0.2       | 0.1                    |
| 12       | 15.493 | 2-Methylpentanal                      | 0.7    | 1.5       | 0.9                    |
| 13       | 15.703 | Pyruvic acid, methyl ester            | 1.2    | 1.3       | 0.7                    |
| 14       | 16.100 | Cyclopentenone                        | 0.4    | 0.4       | 0.2                    |
| 15       | 16.236 | Furfural                              | 1.2    | 1.1       | 0.6                    |
| 16       | 19.086 | Acetol acetate                        | 0.9    | 0.7       | 0.4                    |
| 17       | 19.321 | 2-Butanone                            | 0.3    | 0.3       | 0.2                    |
| 18       | 22.030 | 3-Methylcyclopentanone                | 0.9    | 1.2       | 0.7                    |
| 19       | 22.938 | 2-Furanmethanol                       | 0.2    | 0.2       | 0.1                    |
| 20       | 23.319 | 5-Methylfurfural                      | 0.2    | N.D.      | N.D.                   |
| 21       | 24.048 | 3-Methylcyclopent-2-enone             | 0.2    | 0.2       | 0.1                    |
| 22       | 24.371 | Butyrolactone                         | 0.2    | 0.3       | 0.2                    |
| 23       | 24.937 | 2(5H)-Furanone                        | 0.6    | 0.9       | 0.5                    |
| 24       | 25.603 | 2-Acetyl-5-methylfuran                | 0.2    | 0.2       | 0.1                    |
| 25       | 25.798 | 4-Pentyn-1-ol                         | 0.4    | 0.2       | 0.1                    |
| 26       | 27.025 | 3-Methyl-1,2-cyclopentanedione        | 0.6    | 0.9       | 0.5                    |
| 27       | 27.124 | 2-Hydroxy-3-methylcyclopentenone      | 0.2    | 0.2       | 0.1                    |
| 28       | 28.809 | Phenol                                | 0.3    | 0.2       | 0.1                    |
| 29       | 29.360 | 2-Methoxyphenol                       | 0.4    | 0.3       | 0.2                    |
| 30       | 31.122 | o-Cresol                              | N.D.   | N.D.      | N.D.                   |
| 31       | 31.740 | 3-Ethyl-2-hydroxy-2-cyclopenten-1-one | 0.2    | 0.4       | 0.2                    |
| 32       | 32.033 | 3,5-Dihydroxytoluene                  | 0.2    | 0.2       | 0.1                    |
| 33       | 32.629 | m-Cresol                              | 0.1    | 0.2       | 0.1                    |
| 34       | 32.817 | p-Cresol                              | 0.2    | N.D.      | N.D.                   |

|       |        |                        |      |      |      |
|-------|--------|------------------------|------|------|------|
| 35    | 33.2   | 2-Methylcyclopentanone | N.D. | 0.2  | 0.1  |
| 36    | 34.307 | p-Creosol              | 0.2  | 0.2  | 0.1  |
| 37    | 34.51  | Pentanal               | 0.3  | 0.6  | 0.3  |
| 38    | 38.28  | 3-Methylbutanal        | 0.4  | 0.4  | 0.2  |
| 39    | 38.61  | 2-Pyranone             | 0.3  | 0.3  | 0.2  |
| 40    | 40.1   | Propylene carbonate    | 0.5  | 0.4  | 0.2  |
| 41    | 40.68  | 4-Vinylphenol          | 0.7  | 0.3  | 0.2  |
| 42    | 40.785 | 4-Vinylguaiacol        | 1.4  | N.D. | N.D. |
| 43    | 42.5   | HMF                    | 0.3  | 0.3  | 0.2  |
| 44    | 42.881 | Catechol               | 0.1  | 0.2  | 0.1  |
| 45    | 42.9   | Syringol               | 0.4  | 0.2  | 0.1  |
| 46    | 43.499 | 2-Pentanone            | 0.1  | N.D. | N.D. |
| 47    | 46.226 | 4-Methylcatechol       | 0.2  | N.D. | N.D. |
| 48    | 46.4   | Isoeugenol             | 0.5  | 0.4  | 0.2  |
| 49    | 47.128 | Vanillin               | 0.3  | 0.1  | 0.1  |
| 50    | 47.611 | Hydroquinone           | 0.2  | 0.1  | 0.1  |
| 51    | 56.28  | Levogluconan           | 3.3  | 3.2  | 1.9  |
| Total |        |                        | 36.0 | 33.5 | 19.2 |

Table S2: Compounds quantified by Py-GC/FID analysis (yields reported in g / 100 g dry biomass) for sorghum. Normalized yields are normalized to the original biomass basis.

| Peak no. | RT     | Compound                   | Parent | Alkali PT | Alkali PT (normalized) |
|----------|--------|----------------------------|--------|-----------|------------------------|
| 1        | 4.669  | 2,3-Butanedione            | 0.2    | 0.2       | 0.1                    |
| 2        | 5.266  | 1,5-Hexadien-3-ol          | 1.1    | 1.4       | 0.5                    |
| 3        | 5.605  | Benzene                    | 0.2    | 0.5       | 0.2                    |
| 4        | 6.467  | 2,5-Dimethylfuran          | 1.0    | 2.6       | 1.0                    |
| 5        | 7.020  | 2-Butenal                  | 0.4    | 0.5       | 0.2                    |
| 6        | 7.559  | Acetic acid                | 7.7    | 2.9       | 1.1                    |
| 7        | 8.907  | Acetol                     | 3.3    | 5.0       | 2.0                    |
| 8        | 9.960  | 3-Penten-2-one             | N.D.   | N.D.      | N.D.                   |
| 9        | 13.139 | 1-Hydroxy-2-butanone       | 0.6    | 1.3       | 0.5                    |
| 10       | 13.473 | Acetic acid, methyl ester  | 1.3    | 1.0       | 0.4                    |
| 11       | 14.582 | 3-Pentyn-1-ol              | 0.2    | 0.2       | 0.1                    |
| 12       | 15.493 | 2-Methylpentanal           | 0.5    | 1.6       | 0.6                    |
| 13       | 15.703 | Pyruvic acid, methyl ester | 0.9    | 1.2       | 0.5                    |
| 14       | 16.100 | Cyclopentenone             | 0.4    | 0.5       | 0.2                    |

|       |        |                                       |      |      |      |
|-------|--------|---------------------------------------|------|------|------|
| 15    | 16.236 | Furfural                              | 1.4  | 1.2  | 0.5  |
| 16    | 19.086 | Acetol acetate                        | 0.9  | 0.7  | 0.3  |
| 17    | 19.321 | 2-Butanone                            | 0.2  | 0.3  | 0.1  |
| 18    | 22.030 | 3-Methylcyclopentanone                | 0.6  | 1.2  | 0.5  |
| 19    | 22.938 | 2-Furanmethanol                       | 0.1  | 0.2  | 0.1  |
| 20    | 23.319 | 5-Methylfurfural                      | 0.2  | N.D. | N.D. |
| 21    | 24.048 | 3-Methylcyclopent-2-enone             | 0.2  | 0.2  | 0.1  |
| 22    | 24.371 | Butyrolactone                         | 0.3  | 0.4  | 0.2  |
| 23    | 24.937 | 2(5H)-Furanone                        | 0.5  | 0.9  | 0.3  |
| 24    | 25.603 | 2-Acetyl-5-methylfuran                | 0.1  | 0.2  | 0.1  |
| 25    | 25.798 | 4-Pentyn-1-ol                         | 0.2  | N.D. | N.D. |
| 26    | 27.025 | 3-Methyl-1,2-cyclopentanedione        | 0.6  | 0.9  | 0.4  |
| 27    | 27.124 | 2-Hydroxy-3-methylcyclopentenone      | N.D  | N.D. | N.D. |
| 28    | 28.809 | Phenol                                | 0.5  | 0.2  | 0.1  |
| 29    | 29.360 | 2-Methoxyphenol                       | 0.4  | 0.2  | 0.1  |
| 30    | 31.122 | o-Cresol                              | 0.1  | N.D. | N.D. |
| 31    | 31.740 | 3-Ethyl-2-hydroxy-2-cyclopenten-1-one | 0.2  | 0.3  | 0.1  |
| 32    | 32.033 | 3,5-Dihydroxytoluene                  | 0.1  | 0.2  | 0.1  |
| 33    | 32.629 | m-Cresol                              | N.D  | 0.1  | 0.1  |
| 34    | 32.817 | p-Cresol                              | 0.2  | N.D. | N.D. |
| 35    | 33.2   | 2-Methylcyclopentanone                | 0.1  | 0.2  | 0.1  |
| 36    | 34.307 | p-Creosol                             | N.D  | N.D. | N.D. |
| 37    | 34.51  | Pentanal                              | 0.3  | 0.5  | 0.2  |
| 38    | 38.28  | 3-Methylbutanal                       | 0.3  | N.D. | N.D. |
| 39    | 38.61  | 2-Pyranone                            | 0.2  | 0.2  | 0.1  |
| 40    | 40.1   | Propylene carbonate                   | 0.3  | 0.4  | 0.2  |
| 41    | 40.68  | 4-Vinylphenol                         | 0.6  | 0.1  | 0.1  |
| 42    | 40.785 | 4-Vinylguaiacol                       | 2.0  | N.D. | N.D. |
| 43    | 42.5   | HMF                                   | 0.5  | 0.2  | 0.1  |
| 44    | 42.881 | Catechol                              | N.D  | N.D. | N.D. |
| 45    | 42.9   | Syringol                              | 0.3  | N.D. | N.D. |
| 46    | 43.499 | 2-Pentanone                           | 0.2  | N.D. | N.D. |
| 47    | 46.226 | 4-Methylcatechol                      | N.D  | N.D. | N.D. |
| 48    | 46.4   | Isoeugenol                            | 0.3  | 0.3  | 0.1  |
| 49    | 47.128 | Vanillin                              | 0.1  | N.D. | N.D. |
| 50    | 47.611 | Hydroquinone                          | 0.2  | 0.2  | 0.1  |
| 51    | 56.28  | Levoglucosan                          | 1.3  | 1.7  | 0.7  |
| Total |        |                                       | 31.6 | 30.2 | 11.9 |

Table S3: Compounds quantified by Py-GC/FID analysis (yields reported in g / 100 g dry biomass) for corn stover. Normalized yields are normalized to the original biomass basis.

| Peak no. | RT     | Compound                              | Parent | Alkali PT | Alkali PT (normalized) |
|----------|--------|---------------------------------------|--------|-----------|------------------------|
| 1        | 4.669  | 2,3-Butanedione                       | 0.2    | 0.3       | 0.1                    |
| 2        | 5.266  | 1,5-Hexadien-3-ol                     | 1.1    | 1.3       | 0.7                    |
| 3        | 5.605  | Benzene                               | 0.4    | 0.5       | 0.3                    |
| 4        | 6.467  | 2,5-Dimethylfuran                     | 2.2    | 3.4       | 1.8                    |
| 5        | 7.020  | 2-Butenal                             | 0.7    | 0.5       | 0.3                    |
| 6        | 7.559  | Acetic acid                           | 8.2    | 2.3       | 1.2                    |
| 7        | 8.907  | Acetol                                | 2.9    | 2.8       | 1.5                    |
| 8        | 9.960  | 3-Penten-2-one                        | 0.2    | 0.1       | 0.1                    |
| 9        | 13.139 | 1-Hydroxy-2-butanone                  | 0.6    | 1.1       | 0.6                    |
| 10       | 13.473 | Acetic acid, methyl ester             | 1.7    | 1.1       | 0.6                    |
| 11       | 14.582 | 3-Pentyn-1-ol                         | 0.2    | 0.3       | 0.2                    |
| 12       | 15.493 | 2-Methylpentanal                      | 1.0    | 1.4       | 0.7                    |
| 13       | 15.703 | Pyruvic acid, methyl ester            | 1.5    | 1.5       | 0.8                    |
| 14       | 16.100 | Cyclopentenone                        | 0.3    | 0.4       | 0.2                    |
| 15       | 16.236 | Furfural                              | 1.1    | 1.1       | 0.6                    |
| 16       | 19.086 | Acetol acetate                        | 0.8    | 0.7       | 0.3                    |
| 17       | 19.321 | 2-Butanone                            | 0.3    | 0.3       | 0.1                    |
| 18       | 22.030 | 3-Methylcyclopentanone                | 1.0    | 1.3       | 0.7                    |
| 19       | 22.938 | 2-Furanmethanol                       | 0.2    | 0.2       | 0.1                    |
| 20       | 23.319 | 5-Methylfurfural                      | N.D.   | 0.2       | 0.1                    |
| 21       | 24.048 | 3-Methylcyclopent-2-enone             | 0.2    | 0.2       | 0.1                    |
| 22       | 24.371 | Butyrolactone                         | 0.3    | 0.3       | 0.2                    |
| 23       | 24.937 | 2(5H)-Furanone                        | 0.9    | 1.0       | 0.5                    |
| 24       | 25.603 | 2-Acetyl-5-methylfuran                | 0.2    | 0.3       | 0.1                    |
| 25       | 25.798 | 4-Pentyn-1-ol                         | 0.3    | 0.2       | 0.1                    |
| 26       | 27.025 | 3-Methyl-1,2-cyclopentanedione        | 0.5    | 0.8       | 0.4                    |
| 27       | 27.124 | 2-Hydroxy-3-methylcyclopentenone      | 0.2    | 0.3       | 0.1                    |
| 28       | 28.809 | Phenol                                | 0.3    | 0.1       | 0.1                    |
| 29       | 29.360 | 2-Methoxyphenol                       | 0.3    | N.D.      | N.D.                   |
| 30       | 31.122 | o-Cresol                              | N.D.   | N.D.      | N.D.                   |
| 31       | 31.740 | 3-Ethyl-2-hydroxy-2-cyclopenten-1-one | 0.2    | 0.3       | 0.2                    |
| 32       | 32.033 | 3,5-Dihydroxytoluene                  | N.D.   | 0.2       | 0.1                    |
| 33       | 32.629 | m-Cresol                              | 0.1    | 0.2       | 0.1                    |
| 34       | 32.817 | p-Cresol                              | 0.1    | N.D.      | N.D.                   |

|       |        |                        |      |      |      |
|-------|--------|------------------------|------|------|------|
| 35    | 33.2   | 2-Methylcyclopentanone | 0.2  | 0.3  | 0.2  |
| 36    | 34.307 | p-Creosol              | 0.1  | N.D. | N.D. |
| 37    | 34.51  | Pentanal               | 0.4  | 0.5  | 0.2  |
| 38    | 38.28  | 3-Methylbutanal        | 0.3  | 0.5  | 0.2  |
| 39    | 38.61  | 2-Pyranone             | 0.4  | 0.4  | 0.2  |
| 40    | 40.1   | Propylene carbonate    | 0.4  | 0.3  | 0.2  |
| 41    | 40.68  | 4-Vinylphenol          | 0.8  | N.D. | N.D. |
| 42    | 40.785 | 4-Vinylguaiacol        | 3.1  | N.D. | N.D. |
| 43    | 42.5   | HMF                    | N.D. | 0.4  | 0.2  |
| 44    | 42.881 | Catechol               | N.D. | N.D. | N.D. |
| 45    | 42.9   | Syringol               | 0.6  | N.D. | N.D. |
| 46    | 43.499 | 2-Pentanone            | N.D. | N.D. | N.D. |
| 47    | 46.226 | 4-Methylcatechol       | N.D. | N.D. | N.D. |
| 48    | 46.4   | Isoeugenol             | 0.4  | 0.4  | 0.2  |
| 49    | 47.128 | Vanillin               | 0.2  | N.D. | N.D. |
| 50    | 47.611 | Hydroquinone           | N.D. | N.D. | N.D. |
| 51    | 56.28  | Levoglucosan           | 3.1  | 5.2  | 2.7  |
| Total |        |                        | 38.4 | 32.6 | 17.0 |

Table S4: Compounds quantified by Py-GC/FID analysis (yields reported in g / 100 g dry biomass) for barley straw. Normalized yields are normalized to the original biomass basis.

| Peak no. | RT     | Compound                   | Parent | Alkali PT | Alkali PT (normalized) |
|----------|--------|----------------------------|--------|-----------|------------------------|
| 1        | 4.669  | 2,3-Butanedione            | 0.2    | 0.3       | 0.2                    |
| 2        | 5.266  | 1,5-Hexadien-3-ol          | 1.1    | 1.4       | 0.8                    |
| 3        | 5.605  | Benzene                    | 0.5    | 0.4       | 0.3                    |
| 4        | 6.467  | 2,5-Dimethylfuran          | 2.9    | 2.7       | 1.6                    |
| 5        | 7.020  | 2-Butenal                  | 0.6    | 0.5       | 0.3                    |
| 6        | 7.559  | Acetic acid                | 7.3    | 2.7       | 1.6                    |
| 7        | 8.907  | Acetol                     | 3.4    | 3.2       | 1.9                    |
| 8        | 9.960  | 3-Penten-2-one             | 0.2    | 0.3       | 0.2                    |
| 9        | 13.139 | 1-Hydroxy-2-butanone       | 0.7    | 0.8       | 0.5                    |
| 10       | 13.473 | Acetic acid, methyl ester  | 1.5    | 1.3       | 0.8                    |
| 11       | 14.582 | 3-Pentyn-1-ol              | 0.2    | 0.4       | 0.2                    |
| 12       | 15.493 | 2-Methylpentanal           | 1.6    | 0.6       | 0.3                    |
| 13       | 15.703 | Pyruvic acid, methyl ester | 1.3    | 1.5       | 0.9                    |
| 14       | 16.100 | Cyclopentenone             | 0.4    | 0.4       | 0.2                    |
| 15       | 16.236 | Furfural                   | 1.0    | 1.5       | 0.9                    |



|       |        |                                       |      |      |      |
|-------|--------|---------------------------------------|------|------|------|
| 16    | 19.086 | Acetol acetate                        | 0.7  | 0.8  | 0.4  |
| 17    | 19.321 | 2-Butanone                            | 0.3  | 0.2  | 0.1  |
| 18    | 22.030 | 3-Methylcyclopentanone                | 1.1  | 1.2  | 0.7  |
| 19    | 22.938 | 2-Furanmethanol                       | 0.2  | 0.2  | 0.1  |
| 20    | 23.319 | 5-Methylfurfural                      | 0.1  | 0.2  | 0.1  |
| 21    | 24.048 | 3-Methylcyclopent-2-enone             | 0.2  | 0.2  | 0.1  |
| 22    | 24.371 | Butyrolactone                         | 0.3  | N.D. | N.D. |
| 23    | 24.937 | 2(5H)-Furanone                        | 0.9  | 0.8  | 0.5  |
| 24    | 25.603 | 2-Acetyl-5-methylfuran                | 0.2  | 0.3  | 0.2  |
| 25    | 25.798 | 4-Pentyn-1-ol                         | 0.3  | 0.8  | 0.5  |
| 26    | 27.025 | 3-Methyl-1,2-cyclopentanedione        | 0.6  | 0.8  | 0.5  |
| 27    | 27.124 | 2-Hydroxy-3-methylcyclopentenone      | 0.4  | 0.6  | 0.3  |
| 28    | 28.809 | Phenol                                | 0.2  | 0.2  | 0.1  |
| 29    | 29.360 | 2-Methoxyphenol                       | 0.5  | 0.2  | 0.1  |
| 30    | 31.122 | o-Cresol                              | N.D. | N.D. | N.D. |
| 31    | 31.740 | 3-Ethyl-2-hydroxy-2-cyclopenten-1-one | 0.3  | 0.4  | 0.2  |
| 32    | 32.033 | 3,5-Dihydroxytoluene                  | 0.2  | 0.2  | 0.1  |
| 33    | 32.629 | m-Cresol                              | 0.1  | 0.2  | 0.1  |
| 34    | 32.817 | p-Cresol                              | N.D. | N.D. | N.D. |
| 35    | 33.2   | 2-Methylcyclopentanone                | 0.3  | 0.2  | 0.1  |
| 36    | 34.307 | p-Creosol                             | 0.2  | N.D. | N.D. |
| 37    | 34.51  | Pentanal                              | 0.6  | 0.4  | 0.2  |
| 38    | 38.28  | 3-Methylbutanal                       | 0.2  | 1.1  | 0.7  |
| 39    | 38.61  | 2-Pyranone                            | 0.4  | 0.5  | 0.3  |
| 40    | 40.1   | Propylene carbonate                   | 0.3  | 0.4  | 0.3  |
| 41    | 40.68  | 4-Vinylphenol                         | 0.6  | 0.2  | 0.1  |
| 42    | 40.785 | 4-Vinylguaiacol                       | 0.9  | 0.3  | 0.2  |
| 43    | 42.5   | HMF                                   | 0.2  | 0.7  | 0.4  |
| 44    | 42.881 | Catechol                              | N.D. | N.D. | N.D. |
| 45    | 42.9   | Syringol                              | 0.5  | 0.4  | 0.2  |
| 46    | 43.499 | 2-Pentanone                           | N.D. | N.D. | N.D. |
| 47    | 46.226 | 4-Methylcatechol                      | 0.2  | N.D. | N.D. |
| 48    | 46.4   | Isoeugenol                            | 0.3  | 0.9  | 0.6  |
| 49    | 47.128 | Vanillin                              | 0.3  | N.D. | N.D. |
| 50    | 47.611 | Hydroquinone                          | 0.2  | N.D. | N.D. |
| 51    | 56.28  | Levogluconan                          | 2.0  | 10.2 | 6.1  |
| Total |        |                                       | 36.6 | 40.6 | 24.2 |
